# Supplementary material
Source: Springer Nature journal article supplement (https://www.springermedizin.de/resource/supplementary/12882_2014_784_MOESM1_ESM.pdf/9454712)
Supplement: MOESM1 [file 9454712]

**Assessed for eligibility**

**(n=1,613)**

**Excluded (n=1,460)**

- Inadequate biopsy (n=9)
- eGFR <60 mL/min per 1.73m<sup>2</sup> (n=594)
- Proteinuria  $\geq$  0.5 g/day (n=1322)
- Secondary cause (n=52)
- Follow up duration less than 12 months (n = 248)

**Analysis**

**(n=153)**
